# Supplementary material for: Intensity of perinatal care for extremely preterm babies and outcomes at a higher gestational age: evidence from the EPIPAGE-2 cohort study
Source: Springer Nature journal article supplement (doi:10.1186/s12887-019-1856-1), 2020-01-07
Supplement: MOESM1 [file 17691696]

## RESEARCH

# S1 Appendix: supplementary methods.

Andrei S Morgan<sup>1,2,3\*</sup>, Babak Khoshnood<sup>1</sup>, Caroline Diguisto<sup>1,6,7</sup>, Laurence Foix L'Helias<sup>1,4,5</sup>, Laetitia Marchand-Martin<sup>1</sup>, Monique Kaminski<sup>1</sup>, Jennifer Zeitlin<sup>1</sup>, Gérard Bréart<sup>1</sup>, François Goffinet<sup>1,8</sup> and Pierre-Yves Ancel<sup>1,9</sup>

\*Correspondence:

[andrei.morgan@inserm.fr](mailto:andrei.morgan@inserm.fr)

<sup>1</sup>Université de Paris, Epidemiology and Statistics Research Center/CRESS, INSERM (U1153 – Obstetrical, Perinatal and Pediatric Epidemiology Research Team (EPOPé)), INRA, Hôpital Tenon, Bâtiment Recherche, Rue de la Chine, 75020 Paris, France  
Full list of author information is available at the end of the article

## Multiple imputation

We used multiple imputation due to incomplete responses at two years of age which lead to missing data for both the main outcomes as well as covariates. Multiple imputation was performed using chained equations with the R package ‘mice’.[1] Imputation model variables included the each of the possible exposures (i.e. perinatal intensity group using the primary as well as sensitivity indicators), two year outcomes (survival status, sensorimotor disability and neurodevelopmental impairment), maternal variables (age, parity, country of birth, socioeconomic status), pregnancy variables (fertility treatment, multiple status, fetal sex, chorioamnionitis, prolonged rupture of membranes, spontaneous labour, gestational age at delivery), birth weight z-score, neonatal morbidities (bronchopulmonary dysplasia, necrotising enterocolitis and retinopathy of prematurity) as well as usage of post-natal steroids, whether the baby received maternal breast milk at discharge, and whether there was a severe congenital brain malformation. Neurodevelopmental impairment data corresponded to the five domains (communication, gross motor, fine motor, problem-solving and personal-social) of the Ages and Stages Questionnaire (ASQ)[2] if completed between 22 and 26 months corrected age in children without cerebral palsy or neurosensory disability (deafness and blindness), and who did not have a severe brain malformation. Data for sensorimotor disability and ASQ status were only imputed for children who survived to two years of age. We generated 60 independent data sets using 30 iterations each; data were pooled according to Rubin’s rule.[3]

Table 1: Multiple imputation variables: methods and missingness

| Variable                                                | Variable type              | Model for data prediction | Percentage of values missing |           |
|---------------------------------------------------------|----------------------------|---------------------------|------------------------------|-----------|
|                                                         |                            |                           | foetuses                     | survivors |
| Hospital of birth                                       | Categorical                | No missing data           | 0%                           | 0%        |
| Intensity of perinatal care group *                     | Categorical (3 categories) | No missing data           | 0%                           | 0%        |
| Survival status                                         | Categorical (6 categories) | No missing data           | 0%                           | 0%        |
| Gestational age (weeks)                                 | Numeric                    | No missing data           | 0%                           | 0%        |
| Multiple pregnancy status                               | Binary                     | No missing data           | 0%                           | 0%        |
| Fetal sex                                               | Binary                     | No missing data           | 0%                           | 0%        |
| Maternal age                                            | Categorical (4 categories) | Ordered logit model       | 0.1%                         | 0%        |
| Parents' socioeconomic status                           | Categorical (6 categories) | Multinomial logit model   | 7.1%                         | 5.8%      |
| Maternal fertility treatment                            | Binary                     | Logistic regression       | 3.7%                         | 3.5%      |
| Chorioamnionitis                                        | Binary                     | Logistic regression       | 9.1%                         | 7.3%      |
| Spontaneous labour                                      | Binary                     | Logistic regression       | 6.7%                         | 4.1%      |
| Birth weight z-score                                    | Numeric                    | Predictive mean matching  | 0.7%                         | 0%        |
| Premature rupture of membranes                          | Binary                     | Logistic regression       | 2.9%                         | 1.6%      |
| Maternal origin                                         | Binary                     | Logistic regression       | 2.3%                         | 1.1%      |
| Primiparous                                             | Binary                     | Logistic regression       | 0.8%                         | 0.9%      |
| Postnatal steroids                                      | Binary                     | Logistic regression       | 8.4%                         | 0.9%      |
| Severe bronchopulmonary dysplasia                       | Binary                     | Logistic regression       | 13.8%                        | 5.5%      |
| Severe necrotising enterocolitis                        | Binary                     | Logistic regression       | 7.2%                         | 2.1%      |
| Severe retinopathy of prematurity                       | Binary                     | Logistic regression       | 5.8%                         | 0.8%      |
| Breastmilk at discharge                                 | Binary                     | Logistic regression       | 22.0%                        | 8.5%      |
| Severe cerebral lesions                                 | Binary                     | Logistic regression       | 7.0%                         | 0.9%      |
| Sensorimotor deficiency at 2 years CA                   | Binary                     | Logistic regression       | 27.8%                        | 14.8%     |
| ASQ Communication score below threshold at 2 years CA   | Binary                     | Logistic regression       | 45.1%                        | 35.2%     |
| ASQ gross motor score below threshold at 2 years CA     | Binary                     | Logistic regression       | 44.8%                        | 34.9%     |
| ASQ fine motor score below threshold at 2 years CA      | Binary                     | Logistic regression       | 45.0%                        | 35.1%     |
| ASQ problem-solving score below threshold at 2 years CA | Binary                     | Logistic regression       | 45.6%                        | 35.9%     |
| ASQ personal-social score below threshold at 2 years CA | Binary                     | Logistic regression       | 45.2%                        | 35.4%     |

\* All four intensity indicators used in the main and sensitivity analyses were used for imputation.

### Construction of the intensity indicators used in sensitivity analyses

We created three sensitivity indicators using a method similar to that we employed for the main indicator of perinatal intensity.[4] For each, hospitals were categorised into three levels, low, medium and high, according to a weighted calculation[5] based on the baseline population at 24 to 25 weeks' gestation. The three indicators were based on, respectively, the following treatments: fetal exposure to (any) antenatal steroids, delivery by Caesarean section, and active resuscitation in the delivery room (identified through the EPIPAGE-2 questionnaire completed at birth).

For each indicator, each level 3 hospital was assigned an activity ratio according to the number of fetuses or babies born 24 to 25 weeks' gestation who were exposed to the treatment divided by the number of fetuses alive at maternal admission to hospital who were subsequent born at 24 to 25 weeks' gestation (equation 1).

$$\text{Activity ratio } (p_i) = \frac{\text{Number of babies admitted into NICU}}{\text{Number of foetuses alive at maternal admission to hospital}} \quad (1)$$

Using these ratios, the mean activity level across all included hospitals was obtained using the formula shown in equation 2, where  $P_w$  is the overall weighted mean,  $p_i$  is the activity ratio in hospital  $i$ , and  $w_i$  is the weighting factor for hospital  $i$ :

$$P_w = \frac{\sum p_i w_i}{\sum w_i} \quad (2)$$

The weighting factors for individual hospitals were obtained using the formula shown in equation 3.

$$w_i = \frac{1}{\hat{\sigma}_p^2 + \frac{(\bar{p}(1-\bar{p}) - \hat{\sigma}_p^2)}{n_i}} \quad (3)$$

In this equation,  $\bar{p}$  represents the unweighted mean activity ratio of all hospitals (obtained simply by summation of all the ratios and dividing by the total number of hospitals), and  $\hat{\sigma}_p^2$  is the estimated standard deviation, which is obtained from the following equation:

$$\hat{\sigma}_p^2 = \frac{\sum (p_i - \bar{p})^2}{k - 1} - \frac{\sum \frac{p_i(1-p_i)}{n_i}}{k} \quad (4)$$

Here, again,  $\bar{p}$  is the unweighted mean activity ratio,  $p_i$  is the activity ratio for hospital  $i$ ,  $n_i$  is the number of fetuses alive at maternal admission to hospital  $i$ , and  $k$  is the total number of hospitals.

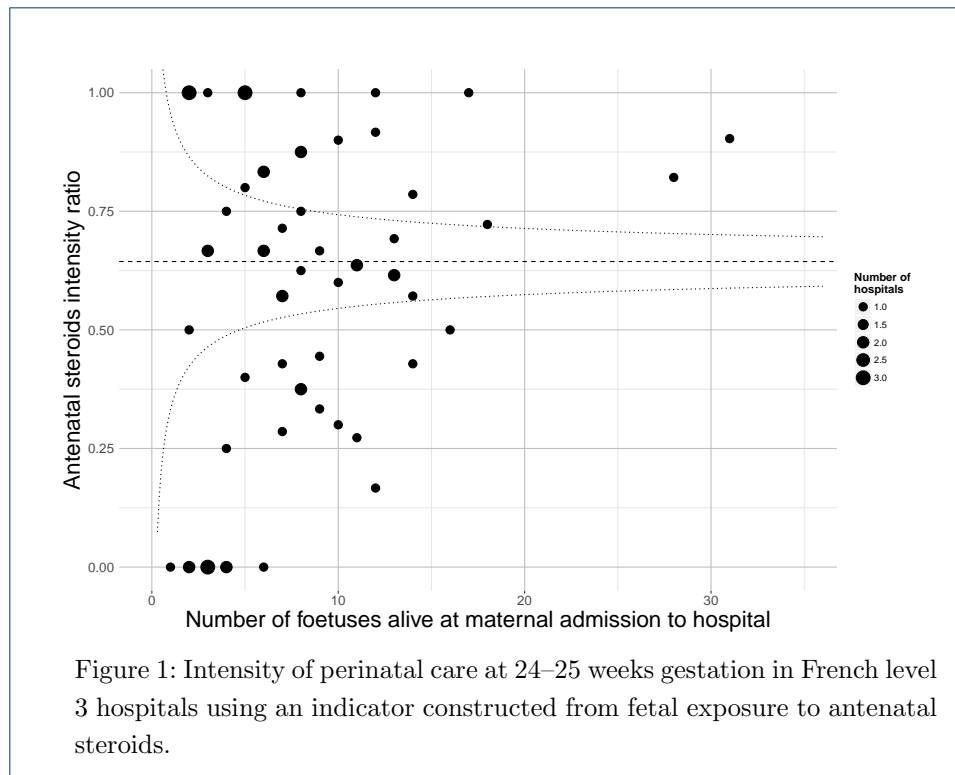

Having calculated the mean activity level, 25<sup>th</sup> and 75<sup>th</sup> percentiles were obtained for different numbers of fetuses alive at maternal admission to hospital using equation 5:

$$25\text{th}/75\text{th percentiles} = P_w \pm 0.675 \left( \frac{\sqrt{\hat{\sigma}_p^2}}{\sqrt{n}} \right) \quad (5)$$

where  $n$  is the number of foetuses admitted into hospital and  $\hat{\sigma}_p^2$  is defined by equation 4. This enabled individual hospitals to be compared to the percentiles, and consequently permitting allocation to one of the three potential groups created. This is shown in figures 1, 2, and 3.

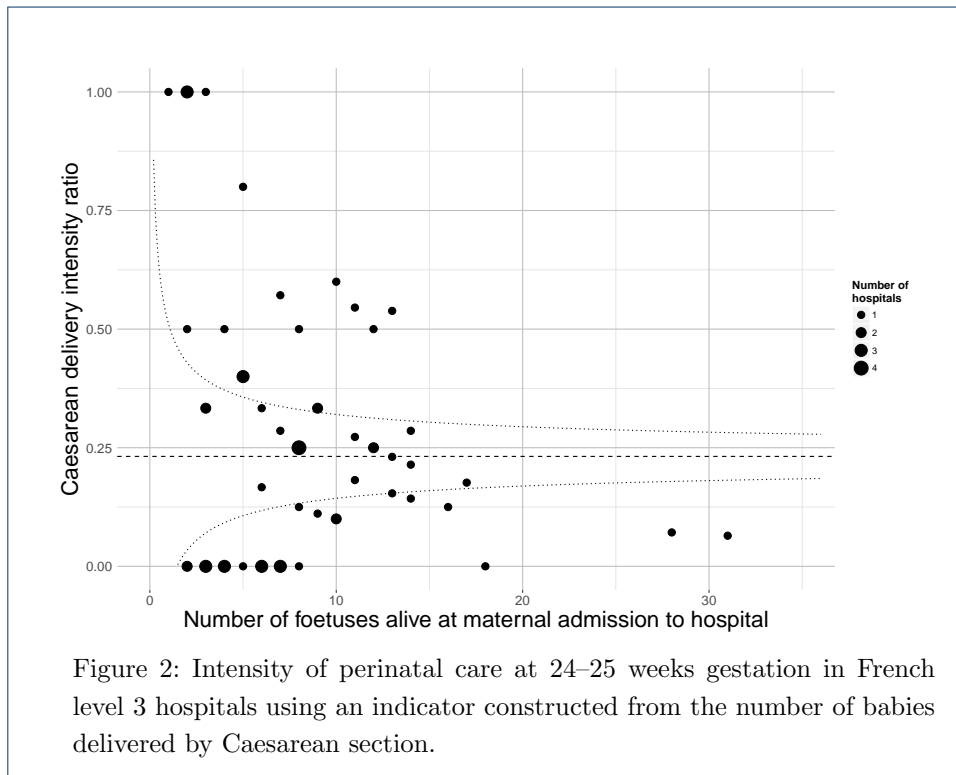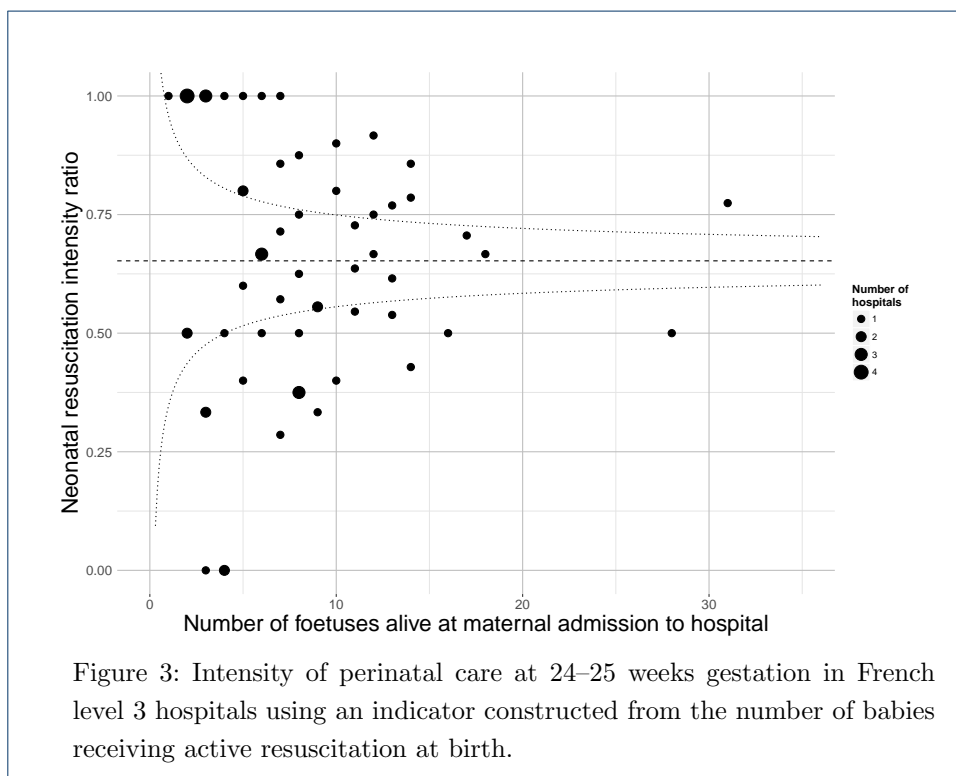

**Author details**

<sup>1</sup>Université de Paris, Epidemiology and Statistics Research Center/CRESS, INSERM (U1153 – Obstetrical, Perinatal and Pediatric Epidemiology Research Team (EPOPé)), INRA, Hôpital Tenon, Bâtiment Recherche, Rue de la Chine, 75020 Paris, France. <sup>2</sup>Institute for Womens' Health, UCL, 74 Huntley Street, WC1E 6AU, London, UK. <sup>3</sup>SAMU 93 - SMUR Pédiatrique, CHI André Gregoire, Groupe Hospitalier Universitaire Paris Seine-Saint-Denis, Assistance Publique des Hôpitaux de Paris, Montreuil, France. <sup>4</sup>UPMC Université Paris 6, Sorbonne Universités, Paris, France. <sup>5</sup>Service de Néonatalogie, Hopital Armand Trousseau, Assistance Publique des Hôpitaux de Paris, Paris, France. <sup>6</sup>Maternité Olympe de Gouges, Centre Hospitalier Regional Universitaire Tours, Tours, France. <sup>7</sup>Université François Rabelais, Tours, France. <sup>8</sup>Maternité Port-Royal, University Paris-Descartes, Hôpitaux Universitaires Paris Centre, Assistance Publique des Hôpitaux de Paris, Paris, France. <sup>9</sup>URC CIC P1419, DHU Risk in Pregnancy, Cochin Hotel Dieu, Assistance Publique des Hôpitaux de Paris, Paris, France.

**References**

1. van Buuren, S., Groothuis-Oudshoorn, K.: mice: Multivariate Imputation by Chained Equations in R. *Journal of Statistical Software, Articles* **45**(3), 1–67 (2011). doi:[10.18637/jss.v045.i03](https://doi.org/10.18637/jss.v045.i03)
2. Squires, J., Bricker, D., Twombly, E., Nickel, R., Clifford, J., Murphy, K., Hoselton, R., Potter, L., Mounts, L., Farrell, J.: *Ages & Stages Questionnaires, Third Edition (ASQ-3)*. Brookes Publishing, ??? (2009)
3. Rubin, D.B.: *Multiple Imputation for Nonresponse in Surveys*. John Wiley & Sons, Inc., USA (1987). doi:[10.1002/9780470316696.fmatter](https://doi.org/10.1002/9780470316696.fmatter)
4. Morgan, A.S., Foix L'Hélias, L., Diguisto, C., Marchand-Martin, L., Kaminski, M., Khoshnood, B., Zeitlin, J., Breart, G., Durrmeyer, X., Goffinet, F., Ancel, P.-Y.: Intensity of perinatal care, extreme prematurity and sensorimotor outcome at 2 years corrected age: evidence from the epipage-2 cohort study. *BMC Medicine* **16**(1), 227 (2018). doi:[10.1186/s12916-018-1206-4](https://doi.org/10.1186/s12916-018-1206-4)
5. Laird, N.M., Mosteller, F.: Some statistical methods for combining experimental results. *International Journal of Technology Assessment in Health Care* **6**(1), 5–30 (1990)
