# Supplementary material for: Intensity of perinatal care for extremely preterm babies and outcomes at a higher gestational age: evidence from the EPIPAGE-2 cohort study
Source: Springer Nature journal article supplement (doi:10.1186/s12887-019-1856-1), 2020-01-07
Supplement: MOESM2 [file 17691696]

RESEARCH

# S2 Appendix: supplementary results relating to intensity of perinatal care for extremely preterm babies and outcomes at a higher gestational age.

Andrei S Morgan<sup>1,2,3\*</sup>, Babak Khoshnood<sup>1</sup>, Caroline Diguisto<sup>1,6,7</sup>, Laurence Foix L'Helias<sup>1,4,5</sup>, Laetitia Marchand-Martin<sup>1</sup>, Monique Kaminski<sup>1</sup>, Jennifer Zeitlin<sup>1</sup>, Gérard Bréart<sup>1</sup>, François Goffinet<sup>1,8</sup> and Pierre-Yves Ancel<sup>1,9</sup>

\*Correspondence:

[andrei.morgan@inserm.fr](mailto:andrei.morgan@inserm.fr)

<sup>1</sup>Université de Paris, Epidemiology and Statistics Research Center/CRESS, INSERM (U1153 – Obstetrical, Perinatal and Pediatric Epidemiology Research Team (EPOPé)), INRA, Hôpital Tenon, Bâtiment Recherche, Rue de la Chine, 75020 Paris, France  
Full list of author information is available at the end of the article

The following tables present data relating to the population of babies born at 27-28 weeks gestation according to the intensity of perinatal care for extremely preterm babies (born at 22-26 weeks' gestational age) in level 3 units in France in 2011 using data from the EPIPAGE 2 study.<sup>[1]</sup>

## Author details

<sup>1</sup>Université de Paris, Epidemiology and Statistics Research Center/CRESS, INSERM (U1153 – Obstetrical, Perinatal and Pediatric Epidemiology Research Team (EPOPé)), INRA, Hôpital Tenon, Bâtiment Recherche, Rue de la Chine, 75020 Paris, France. <sup>2</sup>Institute for Womens' Health, UCL, 74 Huntley Street, WC1E 6AU, London, UK. <sup>3</sup>SAMU 93 - SMUR Pédiatrique, CHI André Gregoire, Groupe Hospitalier Universitaire Paris Seine-Saint-Denis, Assistance Publique des Hôpitaux de Paris, Montreuil, France. <sup>4</sup>UPMC Université Paris 6, Sorbonne Universités, Paris, France. <sup>5</sup>Service de Néonatalogie, Hopital Armand Trousseau, Assistance Publique des Hôpitaux de Paris, Paris, France. <sup>6</sup>Maternité Olympe de Gouges, Centre Hospitalier Regional Universitaire Tours, Tours, France. <sup>7</sup>Université François Rabelais, Tours, France. <sup>8</sup>Maternité Port-Royal, University Paris-Descartes, Hôpitaux Universitaires Paris Centre, Assistance Publique des Hôpitaux de Paris, Paris, France. <sup>9</sup>URC CIC P1419, DHU Risk in Pregnancy, Cochin Hotel Dieu, Assistance Publique des Hôpitaux de Paris, Paris, France.

## References

1. Ancel, P.-Y., Goffinet, F., Kuhn, P., Langer, B., Matis, J., Hernandorena, X., Chabanier, P., Joly-Pedespan, L., Lecomte, B., Vendittelli, F., Dreyfus, M., Guillois, B., Burguet, A., Sagot, P., Sizun, J., Beuchee, A., Rouget, F., Favreau, A., Saliba, E., Bednarek, N., Morville, P., Thiriez, G., Marpeau, L., Marret, S., Kayem, G., Durrmeyer, X., Granier, M., Baud, O., Jarreau, P.-H., Mitanchez, D., Boileau, P., Boulot, P., Cambonie, G., Daude, H., Bedu, A., Mons, F., Fresson, J., Vieux, R., Alberge, C., Arnaud, C., Vayssiere, C., Truffert, P., Pierrat, V., Subtil, D., D'Ercole, C., Gire, C., Simeoni, U., Bongain, A., Sentilhes, L., Roze, J.-C., Gondry, J., Leke, A., Deiber, M., Claris, O., Picaud, J.-C., Ego, A., Debillon, T., Poulichet, A., Coline, E., Favre, A., Flechelles, O., Samperiz, S., Ramful, D., Branger, B., Benhammou, V., Foix-L'Helias, L., Marchand-Martin, L., Kaminski, M.: Survival and morbidity of preterm children born at 22 through 34 weeks' gestation in France in 2011: results of the EPIPAGE-2 cohort study. *JAMA Pediatrics* **169**(3), 230–238 (2015). doi:[10.1001/jamapediatrics.2014.3351](https://doi.org/10.1001/jamapediatrics.2014.3351)

Table 1: Background factors relating to birth at 27-28 weeks' gestation in France in 2011 by exposure (intensity level of perinatal care for extremely preterm babies) group.

| Variable                                              | Levels                                                  | Low |      | Medium |      | High |      | P value |
|-------------------------------------------------------|---------------------------------------------------------|-----|------|--------|------|------|------|---------|
|                                                       |                                                         | n   | %    | n      | %    | n    | %    |         |
| Gestational age (N=747)                               | 27                                                      | 105 | 49.1 | 106    | 42.6 | 136  | 47.9 | 0.312   |
|                                                       | 28                                                      | 109 | 50.9 | 143    | 57.4 | 148  | 52.1 |         |
| Multiple pregnancy (N=747)                            | no                                                      | 152 | 71.0 | 163    | 65.5 | 183  | 64.4 | 0.268   |
|                                                       | yes                                                     | 62  | 29.0 | 86     | 34.5 | 101  | 35.6 |         |
| Fetal sex (N=747)                                     | male                                                    | 96  | 44.9 | 126    | 50.6 | 138  | 48.6 | 0.461   |
|                                                       | female                                                  | 118 | 55.1 | 123    | 49.4 | 146  | 51.4 |         |
| Maternal age group (N=746)                            | <25 years                                               | 48  | 22.4 | 54     | 21.7 | 42   | 14.8 | 0.048   |
|                                                       | 25-29 years                                             | 59  | 27.6 | 73     | 29.3 | 97   | 34.3 |         |
|                                                       | 30-34 years                                             | 49  | 22.9 | 67     | 26.9 | 88   | 31.1 |         |
|                                                       | >=35 years                                              | 58  | 27.1 | 55     | 22.1 | 56   | 19.8 |         |
| Mother born outside of France (N=730)                 | No                                                      | 157 | 76.6 | 190    | 77.6 | 218  | 77.9 | 0.944   |
|                                                       | Yes                                                     | 48  | 23.4 | 55     | 22.4 | 62   | 22.1 |         |
| Single mother (N=687)                                 | Yes                                                     | 28  | 13.9 | 17     | 7.5  | 21   | 8.2  | 0.049   |
|                                                       | No                                                      | 174 | 86.1 | 211    | 92.5 | 236  | 91.8 |         |
| Maternal social security coverage (N=662)             | No                                                      | 17  | 8.9  | 34     | 15.6 | 32   | 12.6 | 0.129   |
|                                                       | Yes                                                     | 173 | 91.1 | 184    | 84.4 | 222  | 87.4 |         |
| Family SES (N=694)                                    | Professional                                            | 39  | 19.8 | 35     | 15.2 | 52   | 19.6 | 0.009   |
|                                                       | Intermediate                                            | 36  | 18.3 | 42     | 18.2 | 67   | 25.2 |         |
|                                                       | Administrative, public service, self-employed, students | 55  | 27.9 | 67     | 29.0 | 70   | 26.3 |         |
|                                                       | Shop assistants, service workers                        | 27  | 13.7 | 37     | 16.0 | 42   | 15.8 |         |
|                                                       | Manual workers                                          | 24  | 12.2 | 44     | 19.0 | 23   | 8.6  |         |
|                                                       | Unemployed                                              | 16  | 8.1  | 6      | 2.6  | 12   | 4.5  |         |
| Primiparous (N=741)                                   | No                                                      | 100 | 46.9 | 114    | 46.5 | 130  | 45.9 | 0.974   |
|                                                       | Yes                                                     | 113 | 53.1 | 131    | 53.5 | 153  | 54.1 |         |
| Maternal fertility treatment (N=719)                  | No                                                      | 186 | 89.0 | 208    | 86.3 | 215  | 79.9 | 0.017   |
|                                                       | Yes                                                     | 23  | 11.0 | 33     | 13.7 | 54   | 20.1 |         |
| pPROM (N=725)                                         | No                                                      | 134 | 62.9 | 152    | 63.3 | 189  | 69.5 | 0.218   |
|                                                       | Yes                                                     | 79  | 37.1 | 88     | 36.7 | 83   | 30.5 |         |
| Chorioamnionitis diagnosed <48hrs to delivery (N=679) | No                                                      | 159 | 79.9 | 167    | 77.0 | 216  | 82.1 | 0.373   |
|                                                       | Yes                                                     | 40  | 20.1 | 50     | 23.0 | 47   | 17.9 |         |
| Small for gestational age (N=742)                     | Yes                                                     | 74  | 34.9 | 96     | 38.6 | 115  | 40.9 | 0.396   |
|                                                       | No                                                      | 138 | 65.1 | 153    | 61.4 | 166  | 59.1 |         |
| Spontaneous labour (N=697)                            | none                                                    | 103 | 50.2 | 112    | 48.3 | 152  | 58.5 | 0.056   |
|                                                       | spontaneous                                             | 102 | 49.8 | 120    | 51.7 | 108  | 41.5 |         |
| Spontaneous rupture of membranes (N=678)              | No                                                      | 100 | 50.0 | 106    | 46.1 | 139  | 56.1 | 0.090   |
|                                                       | Yes                                                     | 100 | 50.0 | 124    | 53.9 | 109  | 43.9 |         |
| Foetal presentation (N=712)                           | cephalic                                                | 122 | 59.5 | 145    | 61.7 | 155  | 57.0 | 0.645   |
|                                                       | breech                                                  | 71  | 34.6 | 78     | 33.2 | 95   | 34.9 |         |
|                                                       | other                                                   | 12  | 5.9  | 12     | 5.1  | 22   | 8.1  |         |

Table 2: Perinatal management factors relating to birth at 27-28 weeks' gestation in France in 2011 by exposure (intensity level of perinatal care for extremely preterm babies) group.

| Variable                     | Levels    | Low |       | Medium |       | High |       | P value |
|------------------------------|-----------|-----|-------|--------|-------|------|-------|---------|
|                              |           | n   | %     | n      | %     | n    | %     |         |
| Antenatal steroids (N=724)   |           |     |       |        |       |      |       |         |
|                              | No        | 27  | 12.98 | 23     | 9.5   | 38   | 13.87 | 0.290   |
|                              | Yes       | 181 | 87.02 | 219    | 90.5  | 236  | 86.13 |         |
| In utero transfer (N=730)    |           |     |       |        |       |      |       |         |
|                              | No        | 92  | 43.6  | 101    | 41.74 | 132  | 47.65 | 0.380   |
|                              | Yes       | 119 | 56.4  | 141    | 58.26 | 145  | 52.35 |         |
| Tocolysis (N=729)            |           |     |       |        |       |      |       |         |
|                              | No        | 99  | 46.7  | 99     | 41.08 | 127  | 46.01 | 0.404   |
|                              | Yes       | 113 | 53.3  | 142    | 58.92 | 149  | 53.99 |         |
| Maternal antibiotics (N=731) |           |     |       |        |       |      |       |         |
|                              | No        | 101 | 47.64 | 114    | 46.91 | 159  | 57.61 | 0.025   |
|                              | Yes       | 111 | 52.36 | 129    | 53.09 | 117  | 42.39 |         |
| MgSO4 usage (N=729)          |           |     |       |        |       |      |       |         |
|                              | No        | 191 | 89.67 | 214    | 89.17 | 258  | 93.48 | 0.174   |
|                              | Yes       | 22  | 10.33 | 26     | 10.83 | 18   | 6.52  |         |
| Mode of delivery (N=722)     |           |     |       |        |       |      |       |         |
|                              | Caesarean | 144 | 68.9  | 177    | 74.37 | 207  | 75.27 | 0.255   |
|                              | Vaginal   | 65  | 31.1  | 61     | 25.63 | 68   | 24.73 |         |
| Baby resuscitated (N=701)    |           |     |       |        |       |      |       |         |
|                              | No        | 17  | 8.37  | 26     | 11.21 | 31   | 11.65 | 0.480   |
|                              | Yes       | 186 | 91.63 | 206    | 88.79 | 235  | 88.35 |         |

Table 3: Outcomes at two years of age (cerebral palsy (CP) and sensory deficiencies (blindness and deafness), and Ages and Stages Questionnaire (ASQ) results below threshold) amongst survivors of babies born at 27-28 weeks' gestation in medium and high intensity units compared to low intensity units in France in 2011 using perinatal activity indicator based on babies born at 24-25 weeks' gestation (subjects with complete data only).

| Model                           | n   | Medium intensity |                | High intensity |                |
|---------------------------------|-----|------------------|----------------|----------------|----------------|
|                                 |     | OR               | (95% CI)       | OR             | (95% CI)       |
| <b>CP/sensory deficiency</b>    |     |                  |                |                |                |
| Unadjusted                      | 539 | 2.40             | (0.75 – 7.72)  | 1.86           | (0.58 – 5.99)  |
| Baseline + GA                   | 539 | 2.54             | (0.79 – 8.15)  | 1.90           | (0.60 – 6.06)  |
| Baseline + GA + multiple status | 539 | 2.52             | (0.79 – 8.11)  | 1.87           | (0.59 – 6.00)  |
| Baseline + extra variables      | 411 | 5.81             | (1.18 – 28.48) | 3.98           | (0.78 – 20.22) |
| <b>ASQ below threshold</b>      |     |                  |                |                |                |
| Unadjusted                      | 402 | 1.54             | (0.85 – 2.80)  | 1.14           | (0.65 – 2.01)  |
| Baseline + GA                   | 402 | 1.63             | (0.88 – 2.99)  | 1.14           | (0.64 – 2.03)  |
| Baseline + GA + multiple status | 402 | 1.55             | (0.83 – 2.89)  | 1.05           | (0.58 – 1.91)  |
| Baseline + extra variables      | 316 | 1.46             | (0.73 – 2.94)  | 0.83           | (0.42 – 1.64)  |

95% CI: 95% confidence interval. GA: gestational age. Extra variables: GA + multiple status + fetal sex + maternal age + family socioeconomic status + fertility treatment + chorioamnionitis + labour type + small for GA + premature rupture of membranes.
