# Supplementary material for: Intensity of perinatal care for extremely preterm babies and outcomes at a higher gestational age: evidence from the EPIPAGE-2 cohort study
Source: Springer Nature journal article supplement (doi:10.1186/s12887-019-1856-1), 2020-01-07
Supplement: MOESM3 [file 17691696]

## RESEARCH

## S3 Appendix: STROBE checklist

Andrei S Morgan<sup>1,2,3\*</sup>, Laurence Foix L'Helias<sup>1,4,5</sup>, Caroline Diguisto<sup>1,6,7</sup>, Laetitia Marchand-Martin<sup>1</sup>, Monique Kaminski<sup>1</sup>, Babak Khoshnood<sup>1</sup>, Jennifer Zeitlin<sup>1</sup>, Gérard Bréart<sup>1</sup>, François Goffinet<sup>1,8</sup> and Pierre-Yves Ancel<sup>1,9</sup>

\* Correspondence:

[andrei.morgan@inserm.fr](mailto:andrei.morgan@inserm.fr)

<sup>1</sup>Université de Paris, Epidemiology and Statistics Research Center/CRESS, INSERM (U1153 – Obstetrical, Perinatal and Pediatric Epidemiology Research Team (EPOPé)), INRA, Hôpital Tenon, Bâtiment Recherche, Rue de la Chine, 75020 Paris, France  
Full list of author information is available at the end of the article

The following table contains the STROBE checklist of items to be included in reports of cohort studies[1] alongside a reference to where in the article the information may be found.

**STROBE checklist for “Intensity of perinatal care for extremely preterm babies and outcomes at a higher gestational age: evidence from the EIPAGE-2 cohort study**

|                           | Item No | Recommendation                                                                                                                  | Section (notes)                         |
|---------------------------|---------|---------------------------------------------------------------------------------------------------------------------------------|-----------------------------------------|
| <b>Title and abstract</b> | 1       | (a) Indicate the study’s design with a commonly used term in the title or the abstract                                          | Title (“cohort study”).                 |
|                           |         | (b) Provide in the abstract an informative and balanced summary of what was done and what was found                             | Abstract: Methods and Results sections. |
| <b>Introduction</b>       |         |                                                                                                                                 |                                         |
| Background/<br>rationale  | 2       | Explain the scientific background and rationale for the investigation being reported                                            | Background (paragraphs 1 to 3).         |
| Objectives                | 3       | State specific objectives, including any prespecified hypotheses                                                                | Background (final paragraph).           |
| <b>Methods</b>            |         |                                                                                                                                 |                                         |
| Study design              | 4       | Present key elements of study design early in the paper                                                                         | Methods section.                        |
| Setting                   | 5       | Describe the setting, locations, and relevant dates, including periods of recruitment, exposure, follow-up, and data collection | Methods (“Study population” section).   |

Continued on next page...

## Strobe checklist (continued)

|                              | Item No        | Recommendation                                                                                                                                                                        | Section (notes)                                                                               |
|------------------------------|----------------|---------------------------------------------------------------------------------------------------------------------------------------------------------------------------------------|-----------------------------------------------------------------------------------------------|
| Participants                 | 6              | (a) Give the eligibility criteria, and the sources and methods of selection of participants. Describe methods of follow-up                                                            | Methods (“Study population” and “Outcomes” sections).                                         |
|                              |                | (b) For matched studies, give matching criteria and number of exposed and unexposed                                                                                                   | N/A.                                                                                          |
| Variables                    | 7              | Clearly define all outcomes, exposures, predictors, potential confounders, and effect modifiers. Give diagnostic criteria, if applicable                                              | Methods (sections on Outcomes, Intensity of perinatal care, Potential explanatory variables). |
| Data sources/<br>measurement | 8 <sup>a</sup> | For each variable of interest, give sources of data and details of methods of assessment (measurement). Describe comparability of assessment methods if there is more than one group. | Methods (sections on Outcomes, Intensity of perinatal care, Potential explanatory variables). |
| Bias                         | 9              | Describe any efforts to address potential sources of bias                                                                                                                             | Methods (“Statistical methods” section).                                                      |
| Study size                   | 10             | Explain how the study size was arrived at                                                                                                                                             | Methods (“Study population”) and Figure 2.                                                    |
| Quantitative variables       | 11             | Explain how quantitative variables were handled in the analyses. If applicable, describe which groupings were chosen and why                                                          | Methods (Potential explanatory variables).                                                    |
| Statistical methods          | 12             | (a) Describe all statistical methods, including those used to control for confounding                                                                                                 | Methods (Statistical methods).                                                                |
|                              |                | (b) Describe any methods used to examine subgroups and interactions                                                                                                                   | Methods (Statistical methods, second paragraph).                                              |
|                              |                | (c) Explain how missing data were addressed                                                                                                                                           | Methods (Statistical methods, second paragraph) and S1 appendix: supplementary methods.       |
|                              |                | (d) If applicable, explain how loss to follow-up was addressed                                                                                                                        | Methods (Statistical methods, second paragraph).                                              |
|                              |                | (e) Describe any sensitivity analyses                                                                                                                                                 | Methods (Sensitivity analyses) and S1 appendix: supplementary methods.                        |

Continued on next page. . .

## Strobe checklist (continued)

|                  | Item No | Recommendation                                                                                                                                                                                               | Section (notes)                                                                                                                                                                                                                                                                                                                                          |
|------------------|---------|--------------------------------------------------------------------------------------------------------------------------------------------------------------------------------------------------------------|----------------------------------------------------------------------------------------------------------------------------------------------------------------------------------------------------------------------------------------------------------------------------------------------------------------------------------------------------------|
| <b>Results</b>   |         |                                                                                                                                                                                                              |                                                                                                                                                                                                                                                                                                                                                          |
| Participants     | 13      | (a) Report numbers of individuals at each stage of study — eg numbers potentially eligible, examined for eligibility, confirmed eligible, included in the study, completing follow-up, and analysed          | Results (paragraph 1) and Figure 2.                                                                                                                                                                                                                                                                                                                      |
|                  |         | (b) Give reasons for non-participation at each stage                                                                                                                                                         | Figure 2.                                                                                                                                                                                                                                                                                                                                                |
|                  |         | (c) Consider use of a flow diagram                                                                                                                                                                           | Figure 2.                                                                                                                                                                                                                                                                                                                                                |
| Descriptive data | 14      | (a) Give characteristics of study participants (eg demographic, clinical, social) and information on exposures and potential confounders                                                                     | Results (paragraph 1), and S2 appendix: supplementary results relating to intensity of perinatal care for extremely preterm babies and outcomes at a higher gestational age (tables 1 and 2).                                                                                                                                                            |
|                  |         | (b) Indicate number of participants with missing data for each variable of interest                                                                                                                          | Results (first paragraph) and S2 appendix: supplementary results relating to intensity of perinatal care for extremely preterm babies and outcomes at a higher gestational age (tables 1 and 2).                                                                                                                                                         |
|                  |         | (c) Summarise follow-up time (eg, average and total amount)                                                                                                                                                  | N/A.                                                                                                                                                                                                                                                                                                                                                     |
| Outcome data     | 15      | Report numbers of outcome events or summary measures over time                                                                                                                                               | Results (first paragraph) and table 1.                                                                                                                                                                                                                                                                                                                   |
| Main results     | 16      | (a) Give unadjusted estimates and, if applicable, confounder-adjusted estimates and their precision (eg, 95% confidence interval). Make clear which confounders were adjusted for and why they were included | Confounders are presented in the Methods (section “Statistical methods”, paragraph 1). Unadjusted and adjusted estimates are presented in the Results as well as tables 2 and 3 and in S2 appendix: supplementary results relating to intensity of perinatal care for extremely preterm babies and outcomes at a higher gestational age (tables 1 to 3). |
|                  |         | (b) Report category boundaries when continuous variables were categorized                                                                                                                                    | Methods (“Potential explanatory variables” section) and S2 appendix (tables 1 and 2).                                                                                                                                                                                                                                                                    |

Continued on next page...

## Strobe checklist (continued)

|                          | Item No | Recommendation                                                                                                                                                             | Section (notes)                                                                                                                                                                                         |
|--------------------------|---------|----------------------------------------------------------------------------------------------------------------------------------------------------------------------------|---------------------------------------------------------------------------------------------------------------------------------------------------------------------------------------------------------|
|                          |         | (c) If relevant, consider translating estimates of relative risk into absolute risk for a meaningful time period                                                           | N/A.                                                                                                                                                                                                    |
| Other analyses           | 17      | Report other analyses done — eg analyses of subgroups and interactions, and sensitivity analyses                                                                           | Results (“Sensitivity analyses” section and S2 appendix: supplementary results relating to intensity of perinatal care for extremely preterm babies and outcomes at a higher gestational age, table 3). |
| <b>Discussion</b>        |         |                                                                                                                                                                            |                                                                                                                                                                                                         |
| Key results              | 18      | Summarise key results with reference to study objectives                                                                                                                   | Discussion (paragraph 1)                                                                                                                                                                                |
| Limitations              | 19      | Discuss limitations of the study, taking into account sources of potential bias or imprecision. Discuss both direction and magnitude of any potential bias                 | Discussion (“Strengths and limitations” section).                                                                                                                                                       |
| Interpretation           | 20      | Give a cautious overall interpretation of results considering objectives, limitations, multiplicity of analyses, results from similar studies, and other relevant evidence | Discussion (“Study findings in context” section) and conclusion.                                                                                                                                        |
| Generalisability         | 21      | Discuss the generalisability (external validity) of the study results                                                                                                      | Discussion (“Study findings in context” section).                                                                                                                                                       |
| <b>Other information</b> |         |                                                                                                                                                                            |                                                                                                                                                                                                         |
| Funding                  | 22      | Give the source of funding and the role of the funders for the present study and, if applicable, for the original study on which the present article is based              | Funding section in the back-matter.                                                                                                                                                                     |

(a) Give information separately for exposed and unexposed groups.

Note: An Explanation and Elaboration article discusses each checklist item and gives methodological background and published examples of transparent reporting. The STROBE checklist is best used in conjunction with this article (freely available on the Web sites of PLoS Medicine at <http://www.plosmedicine.org/>, Annals of Internal Medicine at <http://www.annals.org/>, and Epidemiology at <http://www.epidem.com/>). Information on the STROBE Initiative is available at <http://www.strobe-statement.org>.

**Author details**

<sup>1</sup>Université de Paris, Epidemiology and Statistics Research Center/CRESS, INSERM (U1153 – Obstetrical, Perinatal and Pediatric Epidemiology Research Team (EPOPé)), INRA, Hôpital Tenon, Bâtiment Recherche, Rue de la Chine, 75020 Paris, France. <sup>2</sup>Institute for Womens' Health, UCL, 74 Huntley Street, WC1E 6AU, London, UK. <sup>3</sup>SAMU 93 - SMUR Pédiatrique, CHI André Gregoire, Groupe Hospitalier Universitaire Paris Seine-Saint-Denis, Assistance Publique des Hôpitaux de Paris, Montreuil, France. <sup>4</sup>UPMC Université Paris 6, Sorbonne Universités, Paris, France. <sup>5</sup>Service de Néonatalogie, Hopital Armand Trousseau, Assistance Publique des Hôpitaux de Paris, Paris, France. <sup>6</sup>Maternité Olympe de Gouges, Centre Hospitalier Regional Universitaire Tours, Tours, France. <sup>7</sup>Université François Rabelais, Tours, France. <sup>8</sup>Maternité Port-Royal, University Paris-Descartes, Hôpitaux Universitaires Paris Centre, Assistance Publique des Hôpitaux de Paris, Paris, France. <sup>9</sup>URC CIC P1419, DHU Risk in Pregnancy, Cochin Hotel Dieu, Assistance Publique des Hôpitaux de Paris, Paris, France.

**References**

1. Vandenbroucke, J.P., von Elm, E., Altman, D.G., Gotzsche, P.C., Mulrow, C.D., Pocock, S.J., Poole, C., Schlesselman, J.J., Egger, M.: Strengthening the reporting of observational studies in epidemiology (STROBE): explanation and elaboration. *PLoS Medicine* 4(10), 297 (2007). doi:[10.1371/journal.pmed.0040297](https://doi.org/10.1371/journal.pmed.0040297)
